# Supplementary material
Source: publisher figshare collection journal article supplement (https://acs.figshare.com/ndownloader/files/25518986)

**Table S1. The differential significant expressed proteins between CE-functionalized magnetite nanoparticles and control**

**Figure S1. Identification of RNA integrity and no genomic DNA contamination.**

The integrity of RNA (A) and the PCR results without reverse transcription (B) were detected by 1 % agarose gel electrophoresis. M: marker, lanes 1 to 7 represent respectively RNA of HTC-116/control, HCT-116/5-FU, HCT-116/CE, HCT-116/5-FU+CE, DLD1/control, DLD1/5-FU, DLD1/ CE.

**A**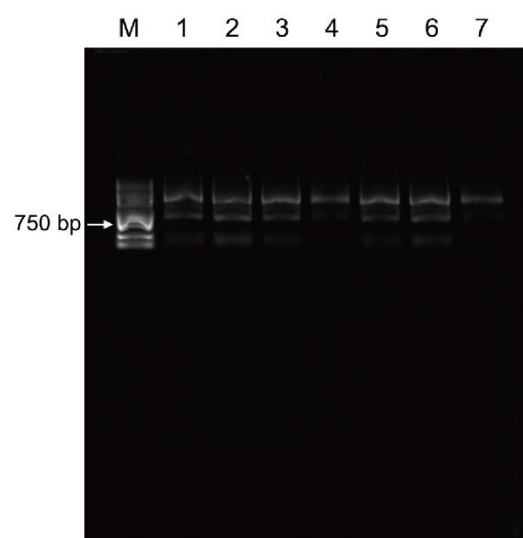**B**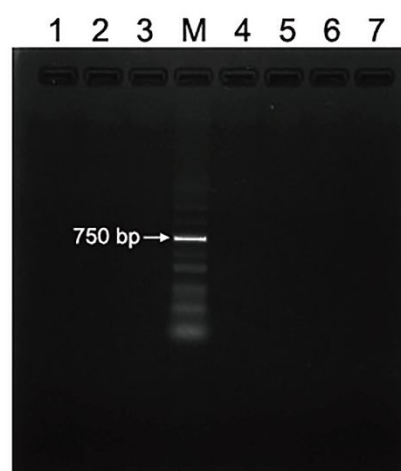

Supplement: Supplementary file 1 [file 25518986]
